# Supplementary material
Source: HighWire-hosted journal article supplement (https://qualitysafety.bmj.com/content/33/11/694)
Supplement: inline-supplementary-material-2 [file inline-supplementary-material-2.pdf]

## Supplementary Table and Figures

It should be noted that among the children identified as having a tracer condition through their GP records, who then completed a Children and Young People's Health Partnership (CYPHP) Healthcheck, 96% (4,546/4,719) reported having a condition.

Sensitivity analyses

**Table S1: Bivariate, Multivariable analyses investigating Step 2, engagement with proactive identification of unmet need (completing CYPHP Healthcheck) sensitivity analyses**

|                       | Excluding Lambeth<br>N=9,078 | Missing category<br>N=19,773 | Complete data<br>analysis<br>N=13,596 | Bivariate<br>N=19,773 |
|-----------------------|------------------------------|------------------------------|---------------------------------------|-----------------------|
|                       | OR 95%CI                     | OR 95%CI                     | OR 95%CI                              | OR 95%CI              |
| Age at start of study | 1.03 (1.00 to 1.05)          | 1.04 (1.03 to 1.06)          | 1.05 (1.03 to 1.07)                   | 1.19 (1.16 to 1.22)   |
| Age squared*          | 0.99 (0.99 to 1.00)          | 0.99 (0.99 to 0.99)          | 0.99 (0.99 to 0.99)                   | 0.98 (0.98 to 0.99)   |
| Sex                   | NS                           | NS                           | NS                                    | 0.96 (1.26 to 0.74)   |
| Most vs Least         | 0.66 (0.52 to 0.82)          | 0.70 (0.59 to 0.83)          | 0.69 (0.56 to 0.84)                   | 0.67 (0.57 to 0.80)   |
| Ethnicity             |                              |                              |                                       |                       |
| White                 | Reference                    | Reference                    | Reference                             | Reference             |
| Asian                 | 0.68 (0.56 to 0.83)          | 0.72 (0.62 to 0.84)          | 0.71 (0.61 to 0.83)                   | 0.76 (0.65 to 0.88)   |
| Black                 | 0.70 (0.61 to 0.80)          | 0.70 (0.64 to 0.78)          | 0.69 (0.62 to 0.76)                   | 0.75 (0.68 to 0.82)   |
| Mixed                 | 0.89 (0.74 to 1.06)          | 0.89 (0.79 to 1.02)          | 0.89 (0.78 to 1.01)                   | 0.93 (0.82 to 1.06)   |
| Other ethnicity       | 0.62 (0.50 to 0.78)          | 0.64 (0.52 to 0.78)          | 0.63 (0.52 to 0.77)                   | 0.63 (0.52 to 0.77)   |
| (Missing Category)    | N/A                          | 0.72 (0.65 to 0.79)          | N/A                                   | N/A                   |
| Condition             |                              |                              |                                       |                       |
| Constipation          | Reference                    | Reference                    | Reference                             | Reference             |
| Eczema                | 2.18 (1.89 to 2.51)          | 2.23 (1.99 to 2.49)          | 2.38 (2.08 to 2.72)                   | 2.08 (1.87 to 2.33)   |
| Asthma                | 1.84 (1.60 to 2.11)          | 2.35 (2.12 to 2.62)          | 2.41 (2.12 to 2.74)                   | 1.95 (1.77 to 2.15)   |
| 2+ Conditions         | 3.84 (3.26 to 4.52)          | 4.15 (3.67 to 4.70)          | 4.18 (3.61 to 4.84)                   | 3.82 (3.39 to 4.31)   |
| Federation            |                              |                              |                                       |                       |
| Southwark North       | Reference                    | Reference                    |                                       |                       |
| Southwark South       | 1.16 (1.02 to 1.31)          | 1.14 (0.94 to 1.38)          | 1.10 (0.89 to 1.35)                   | 1.19 (0.97 to 1.45)   |
| Lambeth               | (Excluded)                   | 0.49 (0.41 to 0.58)          | 0.48 (0.40 to 0.58)                   | 0.54 (0.45 to 0.64)   |

CYPHP – Children and Young People's Health Partnership. \*Age is not linearly associated with Healthcheck uptake, a quadratic variable is added to the model to improve fit. Random effects multivariable models with multiple imputed ethnicity to account for missing data, clustered by GP practice.

Children registered with a GP in Lambeth were less likely to complete a Healthcheck than those from Southwark OR: 0.49 (0.42 to 0.58), when comparing to Southwark North.

**Table S2: Multivariable analyses investigating engagement with proactive identification of unmet need (CYPHP Healthcheck) for individual conditions (Asthma, constipation and eczema)**

|                       | Asthma<br>N=10,564  | Constipation<br>N=5,785 | Eczema<br>N=5,904   |
|-----------------------|---------------------|-------------------------|---------------------|
|                       | OR 95%CI            | OR 95%CI                | OR 95%CI            |
| Age at start of study | 1.01 (0.99 to 1.03) | 1.08 (1.04 to 1.12)     | 1.05 (1.02 to 1.08) |
| Age squared*          | 0.99 (0.99 to 0.99) | 0.99 (0.99 to 0.99)     | 0.99 (0.99 to 1.00) |
| Most vs Least         | 0.77 (0.62 to 0.97) | 0.67 (0.49 to 0.92)     | 0.76 (0.56 to 1.03) |
| Ethnicity             |                     |                         |                     |
| White                 | <i>Reference</i>    | <i>Reference</i>        | <i>Reference</i>    |
| Asian                 | 0.70 (0.57 to 0.87) | 0.83 (0.62 to 1.12)     | 0.69 (0.53 to 0.88) |
| Black                 | 0.79 (0.70 to 0.90) | 0.87 (0.72 to 1.05)     | 0.60 (0.50 to 0.72) |
| Mixed                 | 0.93 (0.79 to 1.10) | 1.09 (0.85 to 1.38)     | 0.82 (0.65 to 1.02) |
| Other ethnicity       | 0.63 (0.49 to 0.81) | 0.68 (0.48 to 0.97)     | 0.55 (0.39 to 0.78) |
| GP Federation         |                     |                         |                     |
| SN                    | <i>Reference</i>    | <i>Reference</i>        | <i>Reference</i>    |
| Lambeth               | 0.60 (0.50 to 0.71) | 0.43 (0.36 to 0.53)     | 0.40 (0.31 to 0.50) |
| SS                    | 1.16 (0.95 to 1.42) | 1.23 (0.99 to 1.52)     | 0.93 (0.71 to 1.21) |

CYPHP – Children and Young People’s Health Partnership. \*Age is not linearly associated with Healthcheck uptake, a quadratic variable is added to the model to improve fit. Random effects multivariable models with multiple imputed ethnicity to account for missing data, clustered by GP practice.

**Table S3: Descriptive statistics of unmet need among children who engaged with Children and Young Person Health Partnership, Population Health Management model**

|                              | Population 2                | Population 3                           |          |       |
|------------------------------|-----------------------------|----------------------------------------|----------|-------|
|                              | Engaged with PHM*<br>N=4719 | Children with unmet needs**<br>N=2,749 |          |       |
|                              | Number                      | Number                                 | Column % | Row % |
| <b>Asthma</b>                | 2124                        | 886                                    | 32.2%    | 41.7% |
| <b>Constipation</b>          | 661                         | 564                                    | 20.5%    | 85.3% |
| <b>Eczema</b>                | 1061                        | 690                                    | 25.1%    | 65.0% |
| <b>More than 1 condition</b> | 873                         | 654                                    | 23.8%    | 74.9% |
| <b>Age</b>                   |                             |                                        |          |       |
| <b>&lt;1 year</b>            | 341                         | 232                                    | 8.4%     | 68.0% |
| <b>1-&lt;2 years</b>         | 306                         | 227                                    | 8.3%     | 74.2% |
| <b>2-&lt;5 years</b>         | 1099                        | 714                                    | 26.0%    | 65.0% |
| <b>5-&lt;8 years</b>         | 969                         | 575                                    | 20.9%    | 59.3% |
| <b>8-&lt;13</b>              | 1570                        | 830                                    | 30.2%    | 52.9% |
| <b>13-&lt;16 years</b>       | 434                         | 216                                    | 7.9%     | 49.8% |
| <b>Sex</b>                   |                             |                                        |          |       |
| <b>Female</b>                | 2181                        | 1,363                                  | 49.6%    | 62.5% |
| <b>Male</b>                  | 2538                        | 1431                                   | 52.1%    | 56.4% |
| <b>Ethnicity</b>             |                             |                                        |          |       |
| <b>Asian</b>                 | 284                         | 174                                    | 6.3%     | 61.3% |
| <b>Black</b>                 | 1,116                       | 715                                    | 26.0%    | 64.1% |
| <b>Mixed</b>                 | 478                         | 271                                    | 9.9%     | 56.7% |
| <b>Other</b>                 | 161                         | 98                                     | 3.6%     | 60.9% |
| <b>White</b>                 | 1,282                       | 692                                    | 25.2%    | 54.0% |
| <b>Missing data</b>          | 1,398                       | 844                                    | 30.7%    | 60.4% |
| <b>Deprivation***</b>        |                             |                                        |          |       |
| <b>1: (Most deprived)</b>    | 1,988                       | 1,261                                  | 45.9%    | 63.4% |
| <b>2</b>                     | 1,652                       | 977                                    | 35.5%    | 59.1% |
| <b>3</b>                     | 786                         | 407                                    | 14.8%    | 51.8% |
| <b>4</b>                     | 259                         | 128                                    | 4.7%     | 49.4% |
| <b>5(Least deprived)</b>     | 33                          | 20                                     | 0.7%     | 60.6% |
| <b>Missing data</b>          | 1                           | 1                                      |          |       |

\*Children who engaged with Children and Young Person Health Partnership, Population Health Management (CYPHP) model by completing the CYPHP Healthcheck, \*\* Children identified with unmet needs as those who met the threshold for care in the CYPHP Healthcheck. Deprivation levels determined from English Indices of Multiple Deprivation (2019) score quintiles

**Table S4: Multivariable analyses investigating engaged children receiving service for individual conditions (Asthma, constipation and eczema)**

|                 | <b>Asthma</b>       | <b>Constipation</b> | <b>Eczema</b>       |
|-----------------|---------------------|---------------------|---------------------|
|                 | <b>N=1,697</b>      | <b>N=665</b>        | <b>N=1,031</b>      |
|                 | OR (95%CI)          | OR (95%CI)          | OR (95%CI)          |
| Most vs Least   | 1.83 (1.09 to 3.08) | 1.07 (0.47 to 2.45) | 1.49 (0.79 to 2.81) |
| Ethnicity       |                     |                     |                     |
| White           | <i>Reference</i>    | <i>Reference</i>    | <i>Reference</i>    |
| Asian           | 1.02 (0.62 to 1.65) | 0.93 (0.50 to 1.73) | 0.94 (0.57 to 1.56) |
| Black           | 1.70 (1.29 to 2.23) | 1.39 (0.87 to 2.20) | 1.05 (0.74 to 1.49) |
| Mixed           | 1.03 (0.71 to 1.48) | 0.90 (0.53 to 1.54) | 0.74 (0.47 to 1.17) |
| Other ethnicity | 0.98 (0.51 to 1.89) | 1.04 (0.34 to 3.22) | 0.60 (0.24 to 1.49) |

OR - odds ratio and 95% confidence interval of receiving specialist care with Children and Young Person Health Partnership, among children who completed the CYPHP Healthcheck, with 95% Confidence interval. For each individual tracer condition

**Table S5: Multivariable analyses investigating children with a tracer condition receiving service for all and individual conditions (Asthma, constipation and eczema)**

|                 | <b>All tracer conditions</b> | <b>Asthma</b>       | <b>Constipation</b> | <b>Eczema</b>       |
|-----------------|------------------------------|---------------------|---------------------|---------------------|
|                 | <b>N=12,823</b>              | <b>N=6,803</b>      | <b>N=3,892</b>      | <b>N=3,859</b>      |
|                 | OR 95%CI                     | OR 95%CI            | OR 95%CI            | OR 95%CI            |
| Most vs Least   | 0.89 (0.65 to 1.22)          | 0.96 (0.62 to 1.48) | 0.80 (0.47 to 1.35) | 1.00 (0.62 to 1.62) |
| Ethnicity       |                              |                     |                     |                     |
| White           | <i>Reference</i>             | <i>Reference</i>    | <i>Reference</i>    | <i>Reference</i>    |
| Asian           | 0.81 (0.62 to 1.06)          | 0.72 (0.49 to 1.06) | 0.98 (0.63 to 1.50) | 0.73 (0.50 to 1.07) |
| Black           | 1.00 (0.84 to 1.19)          | 1.13 (0.90 to 1.41) | 1.12 (0.83 to 1.51) | 0.69 (0.53 to 0.92) |
| Mixed           | 1.00 (0.80 to 1.25)          | 1.01 (0.74 to 1.37) | 1.05 (0.72 to 1.53) | 0.76 (0.53 to 1.09) |
| Other ethnicity | 0.65 (0.43 to 0.98)          | 0.70 (0.41 to 1.20) | 0.60 (0.29 to 1.27) | 0.47 (0.22 to 1.00) |

OR - odds ratio and 95% confidence interval of received specialist service with Children and Young Person Health Partnership, among all children identified with a tracer condition and registered with GP practices offering Children and Young Person Health Partnership specialist care.

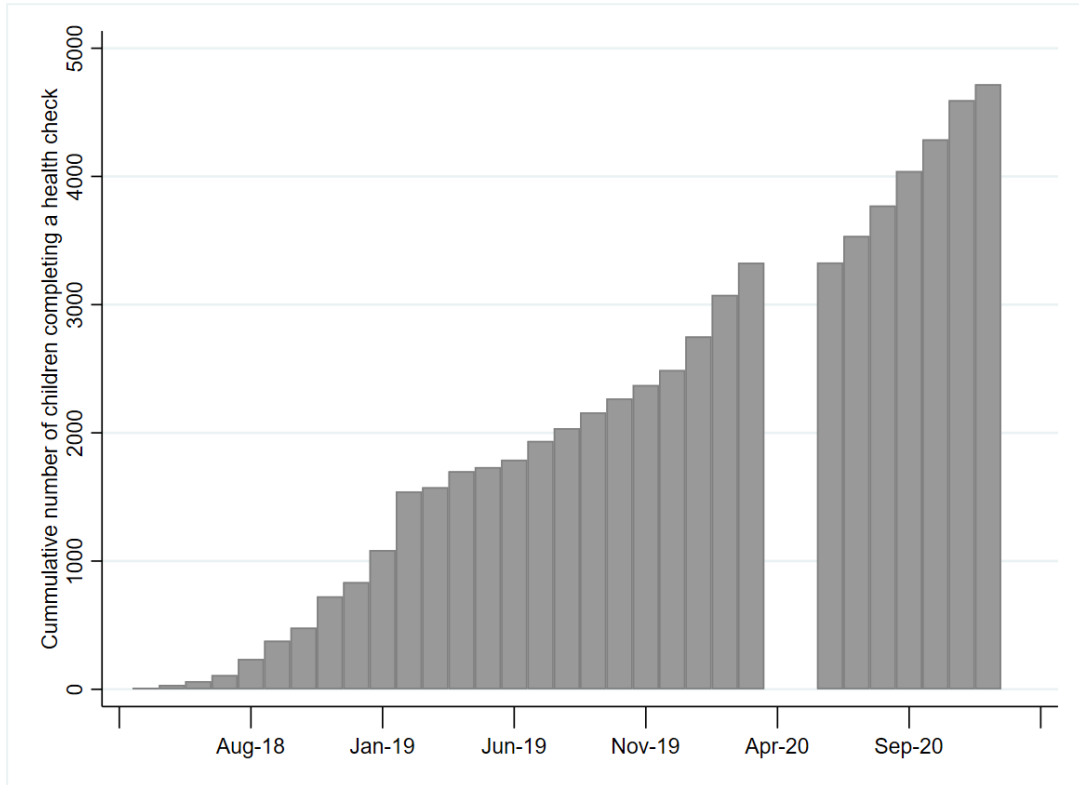

Figure S1: Cumulative number of children completing a CYPHP Healthcheck by month
